# Supplementary material for: Anthocyanin Biosynthesis Associated with Natural Variation in Autumn Leaf Coloration in Quercus aliena Accessions
Source: MDPI journal article supplement (doi:10.3390/ijms232012179), 2022-10-12
Supplement: s1 [file s1]

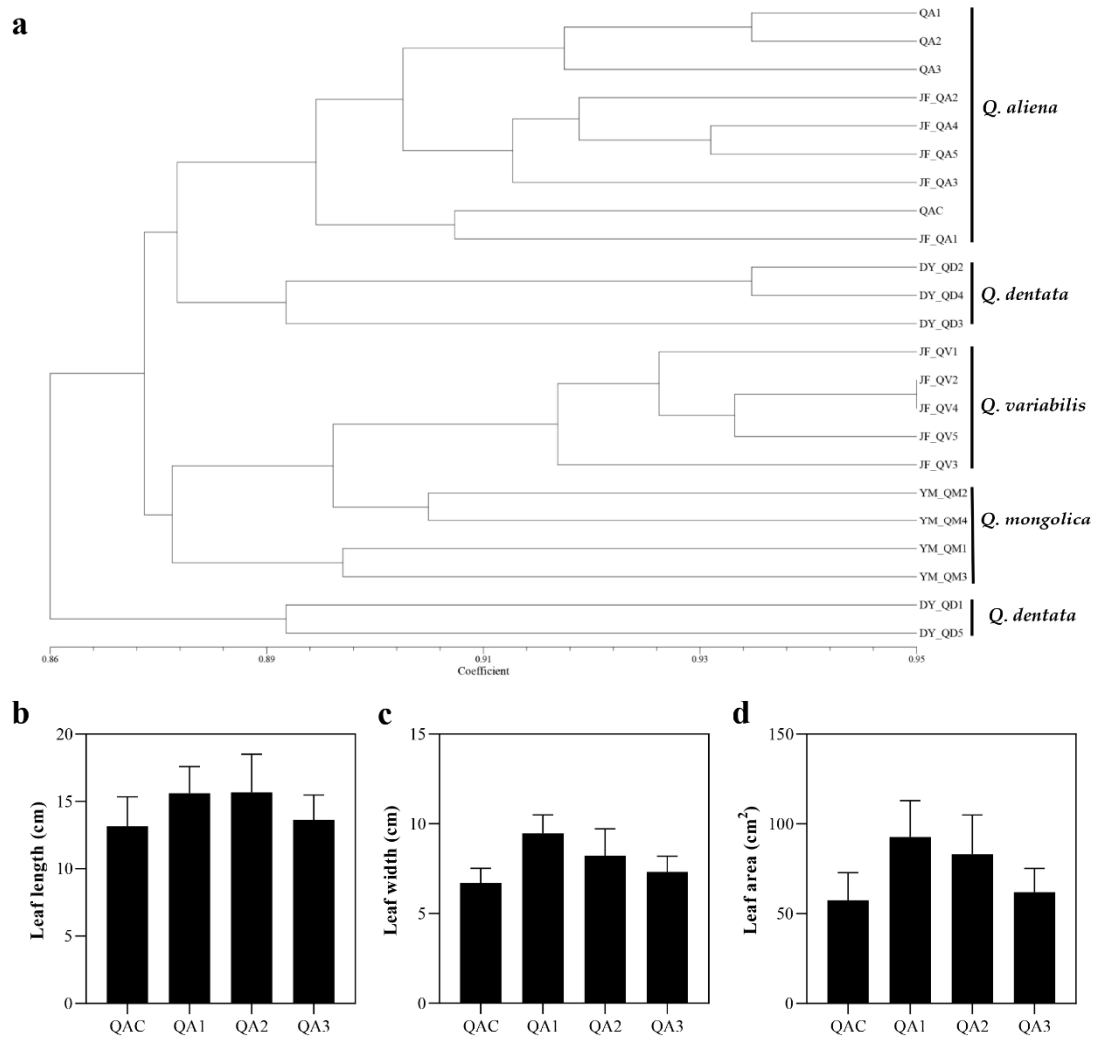

**Figure S1. Analysis of relationship and leaves phenotypic in *Q. aliena* accessions.** (a) JF\_QA1, JF\_QA2, JF\_QA3, JF\_QA4, and JF\_QA5 belong to *Q. aliena*, and are planted in the Jiufeng National Forest Park, Beijing, China. DY\_QD1, DY\_QD2, DY\_QD3, DY\_QD4, and DY\_QD5 belong to *Q. dentata*, and are planted in the Dayangshan National Forest Park, Beijing, China. YM\_QM1, YM\_QM2, YM\_QM3, and YM\_QM4 belong to *Q. mongolica*, and are planted in the Yunmengshan National Forest Park, Beijing, China. JF\_QV1, JF\_QV2, JF\_QV3, JF\_QV4, and JF\_QV5 belong to *Q. variabilis*, and are planted in the Jiufeng National Forest Park, Beijing, China. (b)-(d) leaves phenotypic of the four trees at S3 stage, bars represent the standard deviation (SD, n = 15).

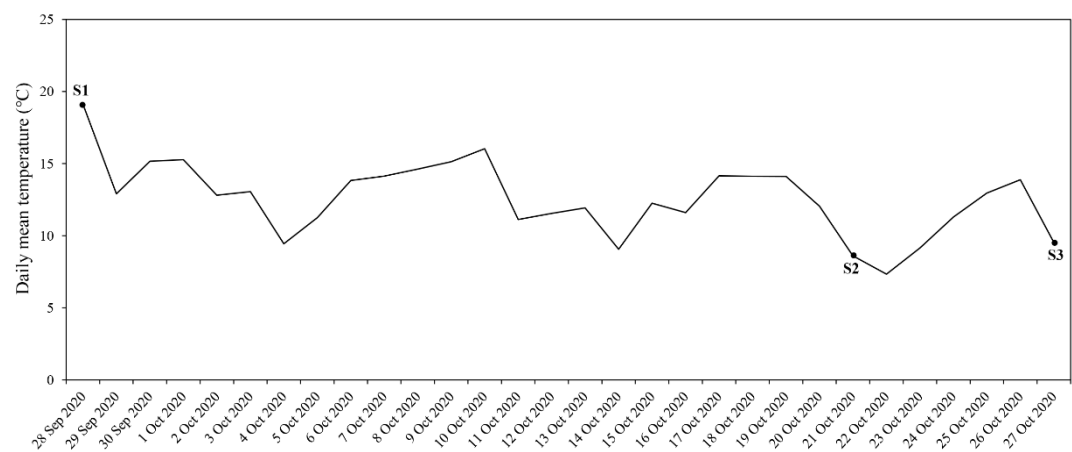

**Figure S2. Daily mean temperatures in Beijing during the discoloration period (Sep-Oct 2020).**

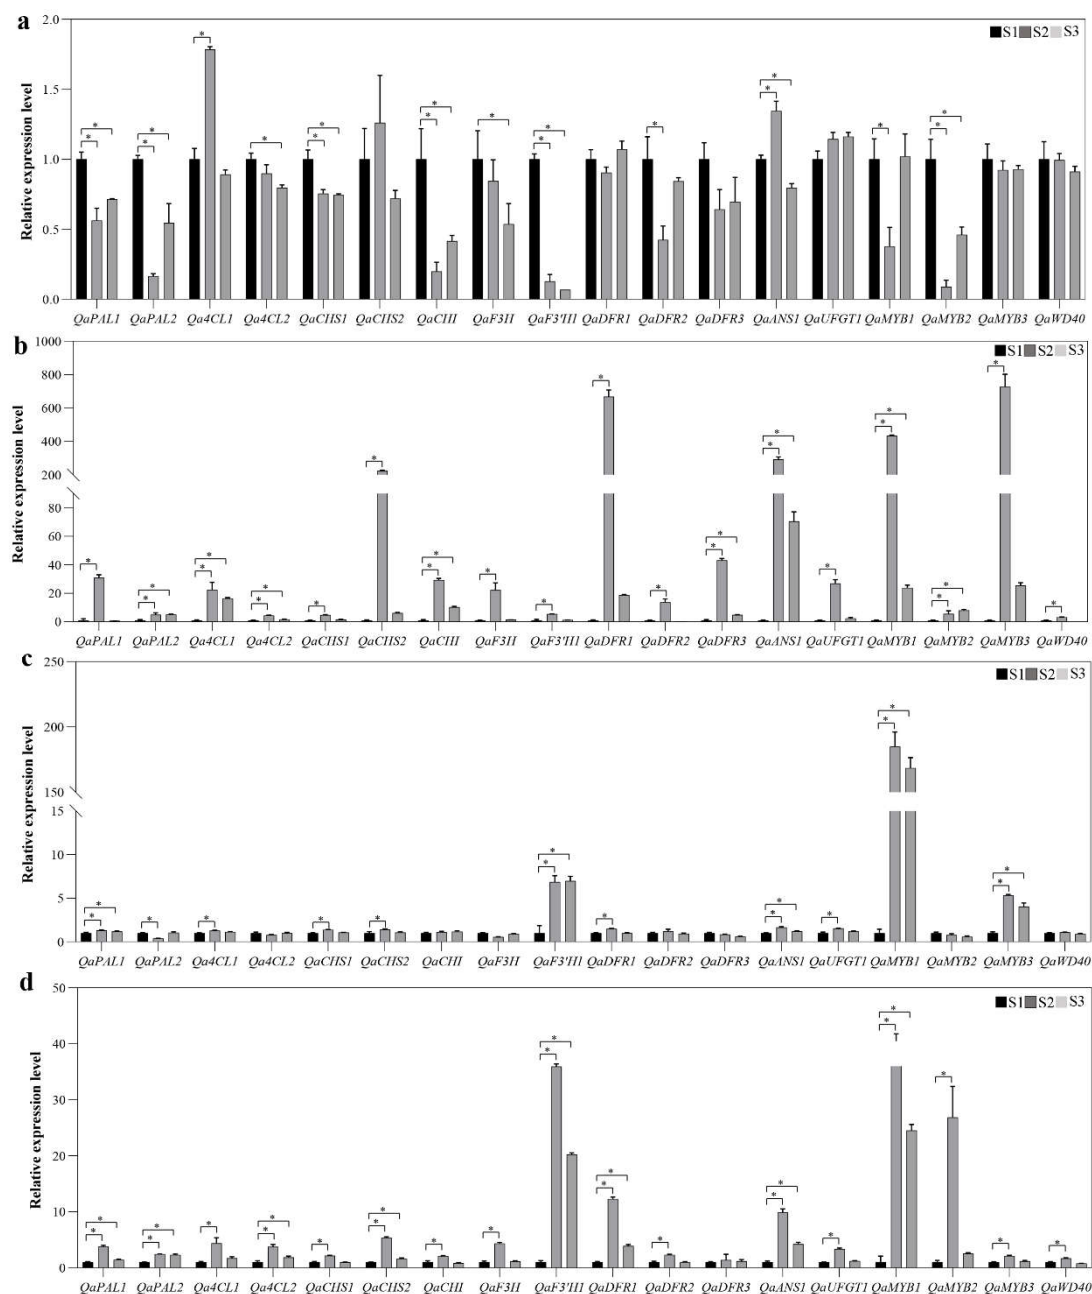

**Figure S3.** Gene expression during leaf senescence based on semi-quantitative PCR: (a) QAC, (b) QA1, (c) QA2, and (d) QA3. Bars represent standard deviation (SD). \*  $P < 0.05$ .

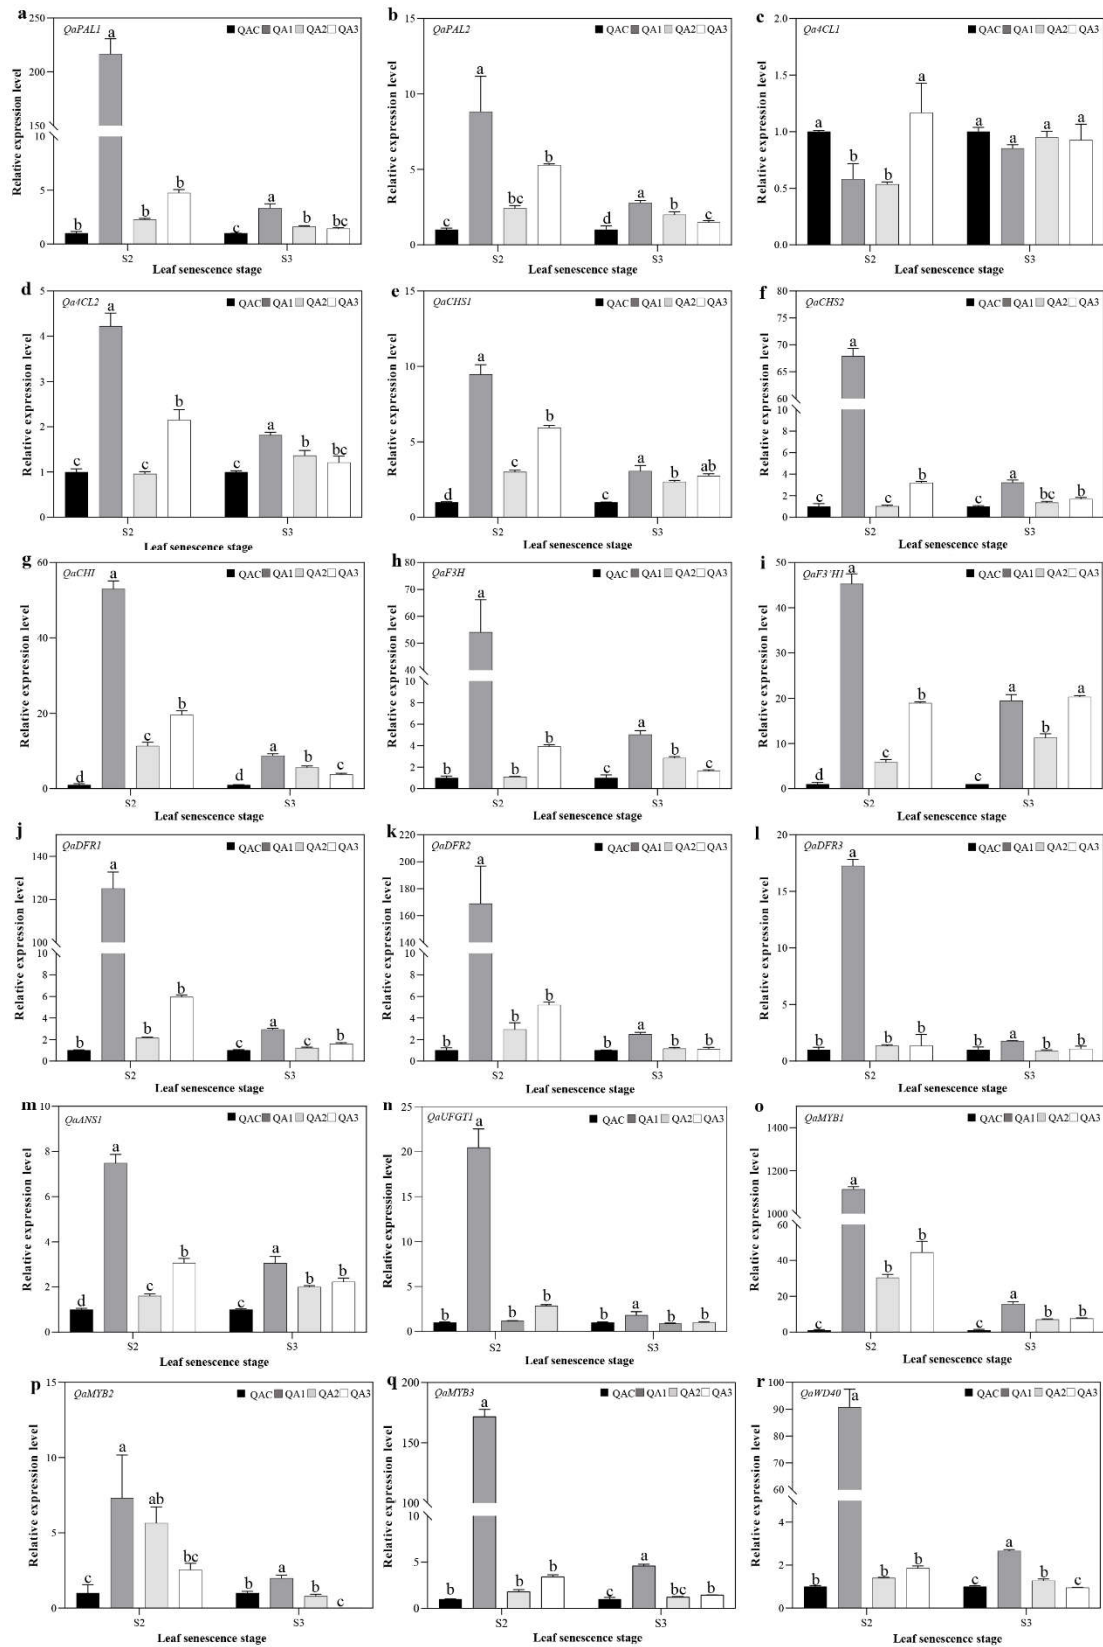

**Figure S4. Differential gene expression during leaf senescence in *Q. aliena* accessions based on semi-quantitative PCR.** Bars represent standard deviation (SD). \*  $P < 0.05$ , and lowercase letters represent significant differences at  $P < 0.05$ .



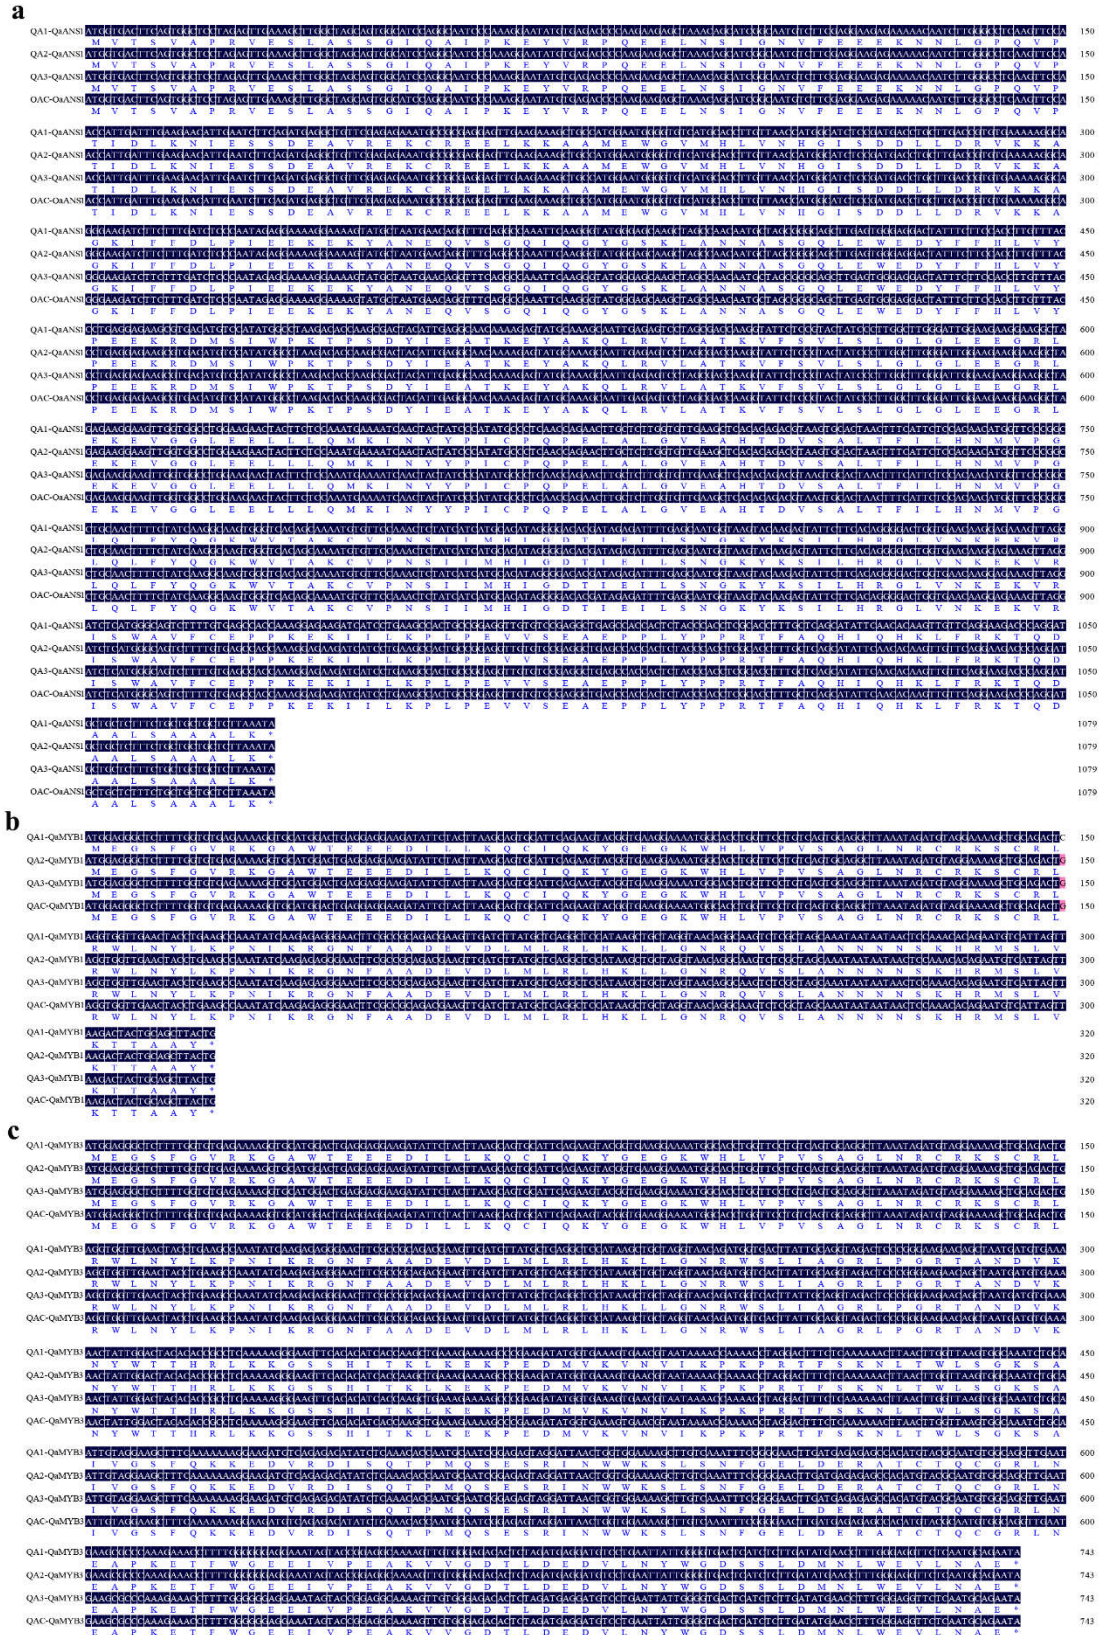

Figure S5 Homology analysis of *QaANS1* (a), *QaMYB1* (b), and *QaMYB3* (c) in the three variants and QAC.





Table S1. Anthocyanin synthesis-related genes in *Quercus aliena* and other species

| Gene           | Homologue in <i>Q. robur</i> L. | Homologues in other species (gene ID)                    |
|----------------|---------------------------------|----------------------------------------------------------|
| <i>QaPAL1</i>  | Qrob_P0101950.2                 | <i>AtPAL1</i> (AT2G37040), <i>AtPAL2</i> (AT3G53260)     |
| <i>QaPAL2</i>  | Qrob_P0328050.2                 | <i>AtPAL3</i> (AT5G04230), <i>AtPAL4</i> (AT3G10340)     |
| <i>Qa4CL1</i>  | Qrob_P0278330.2                 | <i>At4CL1</i> (AT1G51680), <i>At4CL2</i> (AT3G21240)     |
| <i>Qa4CL2</i>  | Qrob_P0058290.2                 | <i>At4CL3</i> (AT1G65060)                                |
| <i>Qa4CL3</i>  | Qrob_P0766030.2                 |                                                          |
| <i>QaCHS1</i>  | Qrob_P0522690.2                 |                                                          |
| <i>QaCHS2</i>  | Qrob_P0004890.2                 | <i>AtCHS</i> (AT5G13930)                                 |
| <i>QaCHS3</i>  | Qrob_P0063990.2                 |                                                          |
| <i>QaCHS4</i>  | Qrob_P0276680.2                 |                                                          |
| <i>QaCHI</i>   | Qrob_P0211560.2                 | <i>AtCHI</i> (AT3G55120)                                 |
| <i>QaF3H</i>   | Qrob_P0200790.2                 | <i>AtF3H</i> (AT3G51240)                                 |
| <i>QaF3'H1</i> | Qrob_P0098800.2                 | <i>VvF3'H</i> (NC_012023.3)                              |
| <i>QaF3'H2</i> | Qrob_P0276000.2                 |                                                          |
| <i>QaDFR1</i>  | Qrob_P0599010.2                 |                                                          |
| <i>QaDFR2</i>  | Qrob_P0497760.2                 | <i>AtDFR</i> (AT5G42800)                                 |
| <i>QaDFR3</i>  | Qrob_P0119180.2                 |                                                          |
| <i>QaANS1</i>  | Qrob_P0502480.2                 | <i>AtANS</i> (AT4G22880)                                 |
| <i>QaANS2</i>  | Qrob_P0514540.2                 |                                                          |
| <i>QaUFGT1</i> | Qrob_P0392850.2                 |                                                          |
| <i>QaUFGT2</i> | Qrob_P0624920.2                 | <i>VvUFGT</i> (NC_012022.3)                              |
| <i>QaUFGT3</i> | Qrob_P0624910.2                 |                                                          |
| <i>QaMYB1</i>  | Qrob_P0355830.2                 | <i>VvMYBA1</i> (BAD18977.1), <i>VvMYBA2</i> (BAD18978.1) |
| <i>QaMYB2</i>  | Qrob_P0437590.2                 | <i>MdMYB10</i> (DQ267896), <i>FaTTG1</i> (JQ989287)      |
| <i>QaMYB3</i>  | Qrob_P0398080.2                 | <i>DcTT8</i> (PKU66073.1)                                |
| <i>QaWD40</i>  | Qrob_P0231390.2                 |                                                          |

**Table S2. Primers used in the study**

| Gene                                                             | Forward primer          | Reverse primer          |
|------------------------------------------------------------------|-------------------------|-------------------------|
| Primers used for PCR amplification                               |                         |                         |
| <i>QaPAL1</i>                                                    | ATGGAATATTGCAATGGAA     | TTAATTTATAGGAAGAGGAGCAC |
| <i>QaPAL2</i>                                                    | ATGGGAACCAATATTAATAAAAG | TCACCTAATCAACTCGGTC     |
| <i>Qa4CL1</i>                                                    | ATGGAGTCCCAAAAAGACCT    | TTAATTTGCTAGACCTGCTGC   |
| <i>Qa4CL2</i>                                                    | ATGGCTCTCCAAACAAAGGA    | TCAAAGGTGAAAGGGACCC     |
| <i>Qa4CL3</i>                                                    | ATGGGAACCTATTTCATAATTT  | TTATTTTCAACATTGGATTCTG  |
| <i>QaCHS1</i>                                                    | ATGGCTTCGTCTTTGGATG     | TCAGTGACTGGTTTCCACG     |
| <i>QaCHS2</i>                                                    | ATGGTGACTGTTGATGAAGTACG | TTAAGCAGAGACGCTGTGGA    |
| <i>QaCHS3</i>                                                    | ATGTCAAGAACTAATGGCAATG  | TTACAGGCTACGGACGAGTAT   |
| <i>QaCHS4</i>                                                    | ATGGCGTTAGTTGGAATCTC    | TCACCCATGCTTTATAGGAGAA  |
| <i>QaCHI1</i>                                                    | ATGGTCCTAGTAGCGTCTCTTC  | TCAGTGACCTTCACATTCACA   |
| <i>QaF3H</i>                                                     | ATGGCTCCTACTACTCTCACAGC | CTAAGCAAAGATATCCTCAACGG |
| <i>QaF3'H1</i>                                                   | ATGGAGTCTTCCTCTTCTTGG   | CTAATAAAGATGAAGCGGGAG   |
| <i>QaF3'H2</i>                                                   | ATGGACTTTTGATCTTTGTAAT  | TTAGAAAGTAATAGGAATAGCTT |
| <i>QaDFR1</i>                                                    | ATGGGGTCAGAGGGTGAG      | TCAATCTTTTTTCGTGCCAG    |
| <i>QaDFR2</i>                                                    | ATGGAAGGAGATAAGGGTACAGT | CTAGAGAAACCCCTTTTCTTTG  |
| <i>QaDFR3</i>                                                    | ATGGCCACCCAAAACCTT      | TTATATCTGCAGCAGGCCCT    |
| <i>QaANS1</i>                                                    | ATGGTGACTTCAGTGGCTC     | TTATTTAAGAGCAGCAGCAGA   |
| <i>QaANS2</i>                                                    | ATGGAACCAGAAATAACGACG   | TTAAGTGCCTTTCTGGATCCTC  |
| <i>QaUFGT1</i>                                                   | ATGTCCTCTTCCTCGACCAAT   | TCATTCCTTTGCTGCATTTC    |
| <i>QaUFGT2</i>                                                   | ATGTCGATGACCAAAAGCTC    | TTAAGGCACAGATATTAGCTCCA |
| <i>QaUFGT3</i>                                                   | ATGTCAGTGACCAAAAGCTCTC  | TTAAGGCACAGATGTTAGCTCG  |
| <i>QaMYB1</i>                                                    | ATGGAGGGCTCTTTCGGT      | TCAGTAAGCTGCAGTAGTCTTAA |
| <i>QaMYB2</i>                                                    | ATGGGAAGGGCTCCTTGT      | TCAGATCAATAGTGATTACAGAA |
| <i>QaMYB3</i>                                                    | ATGGAGGGCTCTTTGGT       | CTATTCTGCATTGAGAACCTCC  |
| <i>QaWD40</i>                                                    | ATGGGTGCGAGTAGCGAT      | TCATACCCTAAGTATCTGAAGCT |
| Primers used for semi-quantitative or quantitative real-time PCR |                         |                         |
| <i>YGQaPAL1</i>                                                  | CTTGCCCCACAAATTGAAGT    | TGAAGCAATGGCTAGACGTG    |
| <i>YGQaPAL2</i>                                                  | GTGAAGCTCGGAGGTGAGAC    | GAAGTTGCACCAAACCCAGT    |
| <i>YGQa4CL1</i>                                                  | GCCAAACTTGGACAGGGTTA    | CCAGTTTCTGGGTCAACGAT    |
| <i>YGQa4CL2</i>                                                  | GGCATTGGACAAGGAGATGT    | TGCGTGATAATGAGCTTTGC    |
| <i>YGQaCHS1</i>                                                  | AGTTGGGAAAAGAAGCAGCA    | CAGCAAAGCAACCTTGTGA     |
| <i>YGQaCHS2</i>                                                  | CCCAATTCTGAGGTTGAGA     | TTTGAAATGAGGCCAGGAAC    |
| <i>YGQaCHI</i>                                                   | GAAAGAGTGCGGAGGAGTTG    | TTTTCAACGGCTTTGGTTTC    |
| <i>YGQaF3H</i>                                                   | GGGAGAAGACCCTTCAGTCC    | AACACCCCAGTCCTCACAAG    |
| <i>YGQaF3'H1</i>                                                 | CAGGGCGGAGATTGATAAAA    | GTATTGCCTCTGCCAATGGT    |
| <i>YGQaDFR1</i>                                                  | GAGGGTGAGACCGTTTGTGT    | CTTCGTTCAAGTCAGCCTTC    |
| <i>YGQaDFR2</i>                                                  | GGCCATAACACTCCAAAGGA    | TTGAATGGCTCCATCAAACA    |
| <i>YGQaDFR3</i>                                                  | CACATGTGGAGGATGTTTGC    | GGGAAATCCCCAAAATCAGT    |
| <i>YGQaANS1</i>                                                  | TGGGTCACAGCAAAATGTGT    | TGGTGGCTCACAAAAGACTG    |
| <i>YGQaUFGT1</i>                                                 | CAAACATGGTGGTGAAGTGC    | ACTCACCTCCTTCCCCAACT    |
| <i>YGQaMYB1</i>                                                  | TTCTGTCTAGTGCAGGCTTA    | GCTAGCGAGACTGCCTGTT     |



|                                                      |                          |                            |
|------------------------------------------------------|--------------------------|----------------------------|
| YGQaMYB2                                             | GGCTGCTTAGGTGTGGAAG      | TTATCAGTTCGACCGGAAG        |
| YGQaMYB3                                             | TCCGGGAAGAACAGCTAATG     | GCAGGTTTCCCACTTAACCA       |
| YGQaWD40                                             | GAGACACCAAGCGTCTGTCA     | CTGAGACGACGACCACTGAA       |
| Primers used for analysis of simple sequence repeats |                          |                            |
| <i>ssrQrZAG96</i>                                    | CCCAGTCACATCCACTACTGTCC  | GGTTGGGAAAAGGAGATCAGA      |
| <i>ssrQrZAG102</i>                                   | GCCTACACTCTTCAATCTACATGA | GACTTGTAACACCTTAAGCATTATCT |
| <i>ssrQrZAG112</i>                                   | TTCTTGCTTTGGTGCGCG       | GTGGTCAGAGACTCGGTAAGTATTC  |
| <i>ssrQrZAG7</i>                                     | CAACTGGTGTTCGGATCAA      | GTGCATTCTTTTATAGCATTAC     |
| <i>Qden03011</i>                                     | AACCCAACCTTCCCTTCATC     | GCAGTGGTGCCTAATGTAGAC      |
| <i>Qden03021</i>                                     | ACAGCAAACCAGACTCCAC      | CCCCAAAGTTTCGGCTAATAC      |
| <i>Qden03032</i>                                     | AGTTGTGGTCCTGCTCGC       | GAAAAGTGCGATGACGGTTG       |
| <i>Qden05011</i>                                     | CCCACTCCCTGTCCATTGT      | CACTGTGTGCTGCGACTTG        |
| <i>Qden05031</i>                                     | CCCGATTGCGCATCATTTGT     | GTAACGCCGTTTTCTCCACC       |
